# Supplementary material for: Technical note: Intercomparison Study of the EC Radiocarbon Analysis Methods Using Synthetic Known Samples
Source: Copernicus journal article supplement (doi:10.5194/egusphere-2023-379), 2023-03-28
Supplement: Supplementary file 1 [file egusphere-2023-379-supplement.pdf]

---

1 Supporting Information for

2 **Technical note: Intercomparison Study of the EC Radiocarbon**

3 **Analysis Methods Using Synthetic Known Samples**

4 Xiangyun Zhang<sup>1,2,3</sup>, Jun Li<sup>1,2,3</sup>\*, Sanyuan Zhu<sup>1,2,3</sup>, Junwen Liu<sup>4</sup>, Ping Ding<sup>5</sup>, Shutao Gao<sup>1,2,3</sup>,  
5 Chongguo Tian<sup>6</sup>, Yingjun Chen<sup>7</sup>, Ping'an Peng<sup>1,2,3</sup>, Gan Zhang<sup>1,2,3</sup>\*

6  
7 <sup>1</sup> State Key Laboratory of Organic Geochemistry and Guangdong province Key Laboratory of  
8 Environmental Protection and Resources Utilization, Guangzhou Institute of Geochemistry,  
9 Chinese Academy of Sciences, Guangzhou, 510640, China

10 <sup>2</sup> CAS Center for Excellence in Deep Earth Science, Guangzhou, 510640, China

11 <sup>3</sup> Guangdong-Hong Kong-Macao Joint Laboratory for Environmental Pollution and Control,  
12 Guangzhou Institute of Geochemistry, Chinese Academy of Science, Guangzhou 510640, China

13 <sup>4</sup> Institute for Environmental and Climate Research, Jinan University, Guangzhou, 511443, China

14 <sup>5</sup> State Key Laboratory of Isotope Geochemistry, Guangzhou Institute of Geochemistry, Chinese  
15 Academy of Sciences, Guangzhou 510640, China

16 <sup>6</sup> Key Laboratory of Coastal Environmental Processes and Ecological Remediation, Yantai Institute  
17 of Coastal Zone Research, Chinese Academy of Sciences, Yantai, 264003, China

18 <sup>7</sup> Department of Environmental Science and Engineering, Fudan University, Shanghai, 200438,  
19 China

20 \*Corresponding author: Jun Li (junli@gig.ac.cn), Gan Zhang (zhanggan@gig.ac.cn)

21  
22  
23  
24  
25  
26  
27  
28  
29  
30  
31  
32  
33  
34  
35  
36

---

37 **Contents of this file**

38

39 **1. Analytical Methods**

40 **2. Supplemental Tables:**

41 **Table S1.** C%, OC/EC, EC/TC (TOT) %,  $\delta^{13}\text{C}$  of the typical combustion samples.

42 **Table S2.** Composition ratio information (C% weight) of the six hybrid samples.

43 **Table S3.** The calculated and measured TC results of C% and  $\delta^{13}\text{C}\%$ ,  $f_M$  for the six hybrid

44 samples.

45 **Table S4.** The EC/TC results of samples, including four combustion source samples and six

46 synthetic known samples, isolated by four purification methods.

47 **Table S5.** Solid-state  $^{13}\text{C}$  NMR structural parameters for Corn straw combustion, Pine wood

48 combustion, Vehicle exhaust and Coal combustion.

49 **Table S6.** The deviation between the results of different separation methods and the theoretical

50 values, according to the ratio of herbaceous to woody combustion.

51 **Table S7.**  $f_M$  and  $\delta^{13}\text{C}$  measurements in SRM 1649 a/b.

52

53 **3. Supplemental Figures:**

54 **Figure S1.** Composition ratio information (C% weight) of the six synthetic known samples.

55 **Figure S2.** Solid-state  $^{13}\text{C}$  NMR spectrum of Corn straw combustion, Pine wood combustion,

56 Vehicle exhaust and Coal combustion

57 **Figure S3.** The field emission scanning electron microscopy (FESEM) results of Corn straw

58 combustion, Pine wood combustion, Vehicle exhaust and Coal combustion.

59

60

61

62

63

64

65

66

67

68

69

70

71

72

73

74

75

76

77

---

78 **1. Analytical Methods**

79

80 **OC/EC and TOC analysis:**

81 The OC and EC in the three combustion source samples were analyzed by the TOT method,  
82 performed with a laboratory OC/EC analyzer (Sunset Laboratory, USA) using the NIOSH2 thermal  
83 protocol. (Salma et al., 2004; Maenhaut et al., 2005) Details regarding the method can be found in  
84 the SI. The total organic carbon (TOC) concentration of the aerosols was also determined. For each  
85 sample, 4 punches (4.8 mm diameter) were placed in precombusted Ag capsules, and the inorganic  
86 carbon was removed by acidification, as described above. After drying, the TOC was quantified by  
87 using a high-temperature catalytic CHN elemental analyzer.

88

89 **Carbon isotope analysis** (Liu et al., 2013; Liu et al., 2017; Xu, et al., 2007):

90 The samples were analyzed for  $^{13}\text{C}$  using a FLASH2000 Elemental Analyzer connected to a  
91 Thermo MAT-253 isotope ratio mass spectrometer. The results are reported using standard delta  
92 notation in permil units (‰):  $\delta$  (‰) =  $(R_{\text{sample}} - R_{\text{reference}})/R_{\text{reference}} \times 1000$ , where  $\delta$  (‰) stands for  
93  $\delta^{13}\text{C}$  (‰), and  $R_{\text{sample}}$  and  $R_{\text{reference}}$  are the isotopic ratios of the sample and reference material,  
94 respectively. For carbon, the reference standard is Vienna Pee Dee Belemnite (VPDB). The  
95 analytical precision for the international and in-house reference materials was generally better than  
96  $\pm 0.5\%$  for  $\delta^{13}\text{C}$ . Replicate measurements of samples yielded similar standard deviations.

97 Preparation of graphite targets for accelerator mass spectrometry (AMS) analysis was  
98 performed using the graphitization line at Guangzhou Institute of Geochemistry of the Chinese  
99 Academy of Sciences (CAS) via the hydrogen and zinc reduction method (Xu et al., 2007). The  
100  $^{14}\text{C}/^{12}\text{C}$  ratios in the graphite samples were determined using a compact AMS instrument (NEC,  
101 National Electrostatics Corporation, USA) at the Guangzhou Institute of Geochemistry, CAS. AMS  
102 calibration was performed using standards (Oxalic Acid Standards I and II) and blanks. The  $\delta^{13}\text{C}$   
103 value was obtained during AMS measurements and applied to correct the  $^{14}\text{C}$  measurements for  
104 isotopic fractionation. The fraction modern ( $f_m$ ) was determined by comparing the measured  $^{14}\text{C}/^{12}\text{C}$   
105 ratio in a sample with that in a modern standard (NBS Oxalic Acid I in AD 1950). All of the reported  
106  $f_m$  values were corrected for  $\delta^{13}\text{C}$  fractionation and for  $^{14}\text{C}$  decay over the time period between 1950  
107 and the year of measurement.

108

109  **$^{13}\text{C}$  solid state NMR experiments:**

---

110 All the  $^{13}\text{C}$  solid state NMR experiments were performed using an AVANCE III 400-MHz NMR  
111 spectrometer (Bruker, Billerica, MA, USA). The resonance frequency of  $^{13}\text{C}$  is 100.613/MHz, and  
112 glycine was used as a standard for chemical shift calibration. The selected samples were tested with  
113 direct-polarization/magic-angle-spinning (DP/MAS)  $^{13}\text{C}$  NMR experiments (Mao and Schmidt-  
114 Rohr, 2004) using a Bruker 4-mm double-resonance probe head and a  $\text{ZrO}_2$  rotor. DP/MAS  $^{13}\text{C}$   
115 NMR experiments were run at a spinning speed of 14 kHz and the number of scans ranged from  
116 4,000 to 40,000. The acquisition time was 5.12  $\mu\text{s}$ , the spectral width was 100 kHz, and the  $90^\circ$   $^{13}\text{C}$   
117 pulse length was 4  $\mu\text{s}$ . The recycle delay for DP/MAS  $^{13}\text{C}$  NMR of the sample was based on  
118 CP/T<sub>1</sub>/TOSS experiments (Mao and Schmidt-Rohr, 2004). The data were processed with Bruker  
119 Topspin 3.1 software.

120

121 **Field emission scanning electron microscopy (FESEM):**

122 **FESEM** was used to observe the particle characteristics of typical carbon aerosol samples. The  
123 field emission scanning electron microscope (Hitachi su8010, Hitachi, Japan) has higher resolution  
124 than the traditional scanning electron microscope, and its resolution can be as high as 2 nanometers  
125 under high voltage. It can be used to observe the micro surface morphology and composition  
126 distribution of various material particles, and has higher imaging quality. The scanning electron  
127 microscope was used to observe the morphology and particle size of amorphous organic matter in  
128 carbonaceous aerosol samples, as well as the relationship between amorphous organic matter and  
129 quartz membrane fiber under electron microscope. The low voltage mode (accelerating voltage of  
130 about 1-2 kV, beam current of 10  $\mu\text{a}$ , working distance of about 3-8 mm) was selected, or the  
131 deceleration mode under low voltage condition (working distance less than 3 The backscattering  
132 image was taken in a typical field of view with a magnification of 3000-100000 times.

133

134

135

136

137

138

139

140

141

---

142 **2. Supplemental Tables:**

143

144 **Table S1.** C%, OC/EC, EC/TC (TOT) %,  $\delta^{13}\text{C}$  of the typical combustion samples.

145

| Sample                | C%<br>( $\pm 3.0$ %) | OC/EC | EC/TC(TOT)% | $\delta^{13}\text{C}$ ‰<br>( $\pm 0.5$ ‰) |
|-----------------------|----------------------|-------|-------------|-------------------------------------------|
| Corn straw combustion | 24.64                | 18.47 | 5.14        | -14.02                                    |
| Pine wood combustion  | 22.99                | 17.10 | 5.52        | -24.41                                    |
| Vehicle exhaust       | 14.49                | 2.42  | 29.21       | -27.10                                    |
| Coal combustion       | 11.60                | 3.85  | 20.62       | -24.32                                    |

146

147

148

149

150

151

152

153

154

155

156

157

158

159

160

161

162

163

164

165

166

167

168

169

170

171

172 **Table S2.** Composition ratio information (C% weight) of the six hybrid samples.

173

| Sampl e | C% (Corn straw combustion ) | C% (Vehicl e exhaust ) | C% (Coal combustion ) | Sampl e | C% (Pine wood combustion ) | C% (Vehicl e exhaust ) | C% (Coal combustion ) |
|---------|-----------------------------|------------------------|-----------------------|---------|----------------------------|------------------------|-----------------------|
| S1      | 56.29                       | 14.99                  | 28.72                 | S4      | 56.27                      | 15.02                  | 28.71                 |
| S2      | 65.92                       | 19.81                  | 14.27                 | S5      | 65.93                      | 19.74                  | 14.34                 |
| S3      | 70.77                       | 19.71                  | 9.52                  | S6      | 70.80                      | 19.69                  | 9.50                  |

174

175

176

177

178

179

180

181

182

183

184

185

186

187

188

189

190

191

192 **Table S3.** The calculated and measured TC results of C% and  $\delta^{13}\text{C}\text{‰}$ ,  $f_M$  for the six hybrid samples.  
 193

| Sample | C% (TC)<br>(calculated) | C% (TC)<br>(measured)<br>( $\pm 3.0\%$ ) | $\delta^{13}\text{C}\text{‰}$ (TC)<br>(calculated) | $\delta^{13}\text{C}\text{‰}$ (TC)<br>(measured)<br>( $\pm 0.5\text{‰}$ ) | $f_M$ (TC)<br>(calculated) | $f_M$ (TC)<br>(measured) |
|--------|-------------------------|------------------------------------------|----------------------------------------------------|---------------------------------------------------------------------------|----------------------------|--------------------------|
| S1     | 17.26                   | 17.70                                    | -18.94                                             | -18.71                                                                    | 0.5629                     | 0.5930 $\pm$ 0.0021      |
| S2     | 18.97                   | 19.10                                    | -18.08                                             | -17.74                                                                    | 0.6592                     | 0.6831 $\pm$ 0.0021      |
| S3     | 19.79                   | 19.39                                    | -17.58                                             | -17.40                                                                    | 0.7077                     | 0.7220 $\pm$ 0.0021      |
| S4     | 17.76                   | 18.18                                    | -24.56                                             | -24.66                                                                    | 0.5869                     | 0.6117 $\pm$ 0.0030      |
| S5     | 19.17                   | 19.31                                    | -24.65                                             | -24.67                                                                    | 0.6818                     | 0.7157 $\pm$ 0.0039      |
| S6     | 19.82                   | 20.08                                    | -24.63                                             | -24.63                                                                    | 0.7290                     | 0.7705 $\pm$ 0.0038      |

194

195

196

197

198

199

200

201

202

203

204

205

206

207

208

209

210

211

212

213

214

215

216 **Table S4.**The EC/TC results of samples, including four combustion source samples and six  
 217 synthetic known samples, isolated by four purification methods.

| Sample     | EC/TC(TOT)<br>% | EC/TC(Hypy)<br>% | EC/TC(CT<br>O-375) % | EC/TC(EC <sub>He</sub> /<br>O <sub>2-475</sub> ) % | EC/TC(EC <sub>LARA</sub><br>) % |
|------------|-----------------|------------------|----------------------|----------------------------------------------------|---------------------------------|
| Corn straw | 5.14            | 2.49             | 0.38                 | 8.54                                               | 1.92                            |
| combustion | 5.52            | 11.40            | 0.47                 | 35.30                                              | 37.57                           |
| Pine wood  |                 |                  |                      |                                                    |                                 |
| combustion |                 |                  |                      |                                                    |                                 |
| Vehicle    | 29.21           | 22.94            | 5.74                 | 12.37                                              | 15.38                           |
| exhaust    |                 |                  |                      |                                                    |                                 |
| Coal       | 20.62           | 20.76            | 1.34                 | 13.64                                              | 9.84                            |
| combustion |                 |                  |                      |                                                    |                                 |
| S1         | 13.19           | 17.32            | 0.87                 | 4.29                                               | 8.10                            |
| S2         | 12.11           | 14.16            | 0.52                 | 3.86                                               | 8.44                            |
| S3         | 11.35           | 10.60            | 0.48                 | 4.31                                               | 6.88                            |
| S4         | 14.09           | 16.68            | 0.09                 | 29.00                                              | 23.59                           |
| S5         | 13.75           | 13.65            | 0.22                 | 29.55                                              | 25.64                           |
| S6         | 12.56           | 11.52            | 0.18                 | 28.32                                              | 27.87                           |

218

219

220

221



**Table S5.** Solid-state  $^{13}\text{C}$  NMR structural parameters for Corn straw combustion, Pine wood combustion, Vehicle exhaust and Coal combustion.

| Sample          |       | fa   | fa <sup>C</sup> | fa'  | fa <sup>H</sup> | fa <sup>N</sup> | fa <sup>P</sup> | fa <sup>S</sup> | fa <sup>B</sup> | fa <sup>L</sup> | fa <sup>H</sup> | fa <sup>*</sup> | fa <sup>O</sup> | C  | FAA  | FMA  | Cn'  | faC+ 0.5*(fa <sup>P</sup> + fa <sup>O</sup> )* 100 |
|-----------------|-------|------|-----------------|------|-----------------|-----------------|-----------------|-----------------|-----------------|-----------------|-----------------|-----------------|-----------------|----|------|------|------|----------------------------------------------------|
| Corn combustion | straw | 0.48 | 0.03            | 0.46 | 0.21            | 0.25            | 0.05            | 0.08            | 0.32            | 0.52            | 0.22            | 0.14            | 0.22            | 64 | 0.28 | 0.27 | 6.5  | 13.53                                              |
| Pine combustion | wood  | 0.51 | 0.01            | 0.50 | 0.22            | 0.28            | 0.04            | 0.1             | 0.35            | 0.49            | 0.18            | 0.16            | 0.2             | 68 | 0.28 | 0.33 | 4.9  | 12.01                                              |
| Vehicle exhaust |       | 0.41 | 0.03            | 0.38 | 0.09            | 0.29            | 0.03            | 0.07            | 0.28            | 0.59            | 0.3             | 0.15            | 0.18            | 86 | 0.26 | 0.25 | 8.43 | 10.53                                              |
| Coal combustion |       | 0.73 | 0.06            | 0.67 | 0.29            | 0.38            | 0.08            | 0.14            | 0.45            | 0.27            | 0.11            | 0.09            | 0.08            | 56 | 0.33 | 0.33 | 1.93 | 8.06                                               |

| Structural parameter | Chemical shift range (ppm) | Carbon type                      | Parameter | Definition                                                    | Description                                        |
|----------------------|----------------------------|----------------------------------|-----------|---------------------------------------------------------------|----------------------------------------------------|
| fa                   | 90-240                     | Aromatic-carboxyl-carbonyl-amide | C         |                                                               | Average carbons per aromatic cluster <sup>49</sup> |
| fa <sup>C</sup>      | 165-240                    | Carboxyl-carbonyl-amide          | FAA       | (fa <sup>P</sup> + fa <sup>S</sup> )/fa'                      | Fraction of aromatic carbons with attachments      |
| fa'                  | 90-165                     | Aromatic                         | FMA       | fa <sup>L</sup> /fa <sup>L</sup>                              | Fraction of methyl in aliphatic                    |
| fa <sup>H</sup>      | 90-165                     | Protonated aromatic (w/o DD)     | Cn'       | fa <sup>L</sup> /fa <sup>S</sup>                              | Average aliphatic carbon chain length              |
| fa <sup>N</sup>      | 90-165                     | Non-protonated aromatic (w/ DD)  |           | fa <sup>C</sup> + 0.5(fa <sup>P</sup> + fa <sup>O</sup> )*100 | A lower limit estimate for organic oxygen          |
| fa <sup>P</sup>      | 150-165                    | Phenoxy-phenolic                 |           |                                                               |                                                    |
| fa <sup>S</sup>      | 135-150                    | Alkyl-substituted aromatic       |           |                                                               |                                                    |
| fa <sup>B</sup>      | 90-135                     | Bridgehead aromatic              |           |                                                               |                                                    |
| fa <sup>L</sup>      | 0-90                       | Aliphatic                        |           |                                                               |                                                    |
| fa <sup>H</sup>      | 22-50                      | Methylene/methine                |           |                                                               |                                                    |
| fa <sup>*</sup>      | 0-22 & 50-60               | Methyl/methoxy                   |           |                                                               |                                                    |
| fa <sup>O</sup>      | 50-90                      | Alcohol/ether                    |           |                                                               |                                                    |

**Table S6.** The deviation between the results of different separation methods and the theoretical values, according to the ratio of herbaceous to woody combustion.

|                           | Biomass*   |       | Hypy        | CTO-375     | EC <sub>He/O2-475</sub> | ECLARA      |
|---------------------------|------------|-------|-------------|-------------|-------------------------|-------------|
|                           | Herbaceous | Woody |             |             |                         |             |
| Africa                    | 0.79       | 0.21  | -37.38±1.36 | 93.88±20.79 | 57.85 ±6.84             | 14.80 ±6.84 |
| Asia                      | 0.55       | 0.45  | -21.15±3.28 | 85.12±16.08 | 73.51 ±4.33             | 44.76 ±5.22 |
| Australia/Oceania         | 0.91       | 0.09  | -45.49±3.35 | 98.27±23.21 | 50.02 ±8.12             | -0.19 ±7.74 |
| Central America/Caribbean | 0.10       | 0.90  | 9.27±11.26  | 68.68 ±8.61 | 102.88 ±1.97            | 100.94±3.90 |
| Europe                    | 0.27       | 0.73  | -2.22±8.23  | 74.89±11.06 | 91.79 ±1.93             | 79.72 ±4.00 |
| North America             | 0.10       | 0.90  | 9.27±11.26  | 68.68 ±8.61 | 102.88 ±1.97            | 100.94±3.90 |
| South America             | 0.39       | 0.61  | -10.34±6.10 | 79.27±13.11 | 83.96 ±2.80             | 64.74 ±4.40 |
| Global average            | 0.58       | 0.42  | -23.18±2.76 | 86.21±16.66 | 71.56 ±4.64             | 41.01 ±5.41 |

\* The ratio of herbaceous and woody was calculated according to the reference (Bond et al., 2004; Zhang et al., 2004; Streets et al., 2003; Stevens et al., 2017)

**Table S7.**  $f_M$  and  $\delta^{13}C$  measurements in SRM 1649 a/b.

| Sample   | $f_M$                      | $M_C$ ( $\mu\text{g}$ ) | $\delta^{13}C$ (‰ vs VPDB) | EC/TC             | reference                 |
|----------|----------------------------|-------------------------|----------------------------|-------------------|---------------------------|
| 1649b TC | 0.525 $\pm$ 0.002 (n = 1)  | 220                     | -25.6 $\pm$ 0.5 (n = 2)    | 0.275 $\pm$ 0.050 | this work                 |
| 1649a TC | 0.522 $\pm$ 0.018 (n = 5)  | 12–87                   | -25.5 $\pm$ 0.6 (n = 2)    | 0.280 $\pm$ 0.080 | ref (Szidat et al., 2004) |
| 1649a TC | 0.510 $\pm$ 0.011 (n = 3)  | not given               | -25.3 $\pm$ 0.3 (n = 2)    | 0.080 $\pm$ 0.010 | ref (Reddy et al., 2002)  |
| 1649a TC | 0.610 $\pm$ 0.040          | not given               | not given                  | not given         | ref (Currie et al., 2002) |
| 1649a TC | 0.505 $\pm$ 0.003          | not given               | not given                  | 0.458 $\pm$ 0.025 | ref (Currie et al., 2002) |
| 1649a TC | 0.517 $\pm$ 0.004          | not given               | not given                  | not given         | ref (Currie et al., 2002) |
| 1649b EC | 0.108 $\pm$ 0.002 (n = 1)  | 270                     | -24.9 $\pm$ 0.5 (n = 2)    | 0.275 $\pm$ 0.050 | this work                 |
| 1649b EC | 0.112 $\pm$ 0.080* (n = 1) | ~460                    | -24.9 $\pm$ 0.5 (n = 2)    | 0.275 $\pm$ 0.050 | this work                 |
| 1649a EC | 0.066 $\pm$ 0.020 (n = 4)  | 37–70                   | -24.8 $\pm$ 0.5 (n = 4)    | 0.280 $\pm$ 0.080 | ref (Szidat et al., 2004) |
| 1649a EC | 0.065 $\pm$ 0.014 (n = 3)  | ~2800                   | -26.55 $\pm$ 0.04          | 0.080 $\pm$ 0.010 | ref (Reddy et al., 2002)  |
| 1649a EC | 0.140 $\pm$ 0.050 (n = 1)  | 459                     | not given                  | ~0.280            | ref (Liu et al., 2013)    |
| 1649a EC | 0.150 $\pm$ 0.080          | not given               | not given                  | not given         | ref (Heal et al., 2011)   |
| 1649a EC | 0.065 $\pm$ 0.003 (n = 1)  | not given               | not given                  | 0.077 $\pm$ 0.002 | ref (Currie et al., 2002) |
| 1649a EC | 0.153 $\pm$ 0.002          | not given               | not given                  | 0.458 $\pm$ 0.025 | ref (Currie et al., 2002) |
| 1649a EC | 0.038 $\pm$ 0.012          | not given               | not given                  | 0.109 $\pm$ 0.005 | ref (Currie et al., 2002) |

\* The same 1649b EC obtained by the Hypy method was sent to BETA for  $^{14}C$  analysis.

### 3. Supplemental Figures:

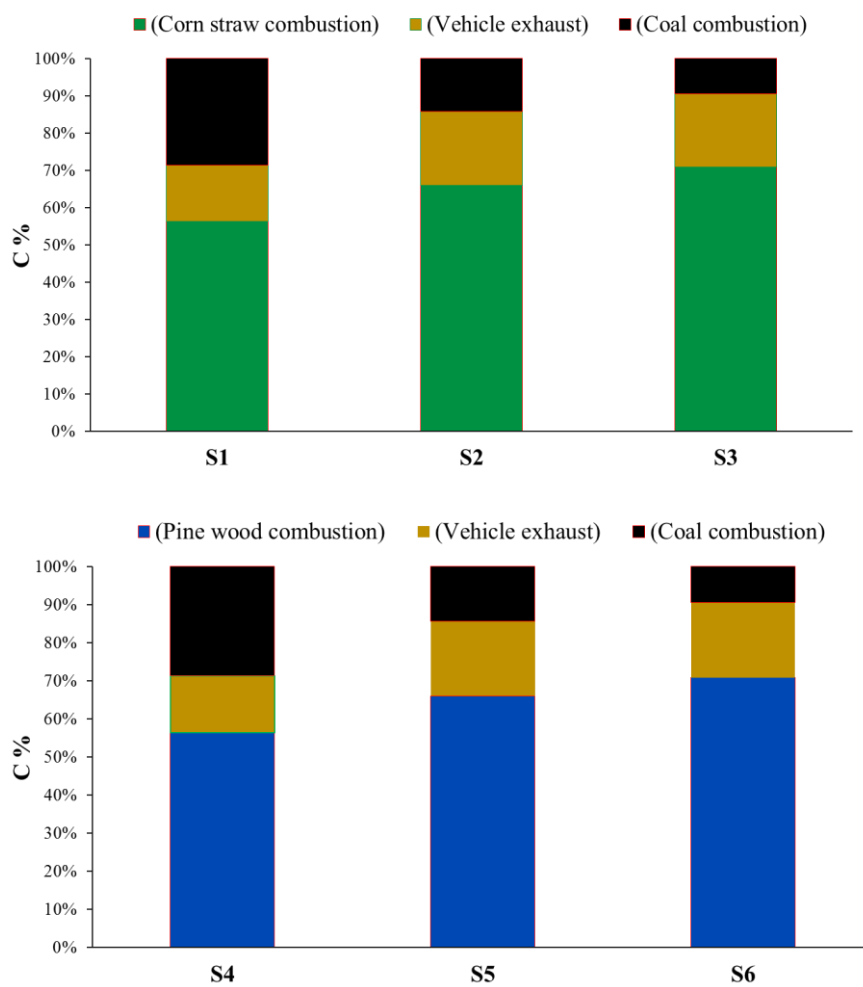

**Figure S1.** Composition ratio information (C% weight) of the six synthetic known samples.

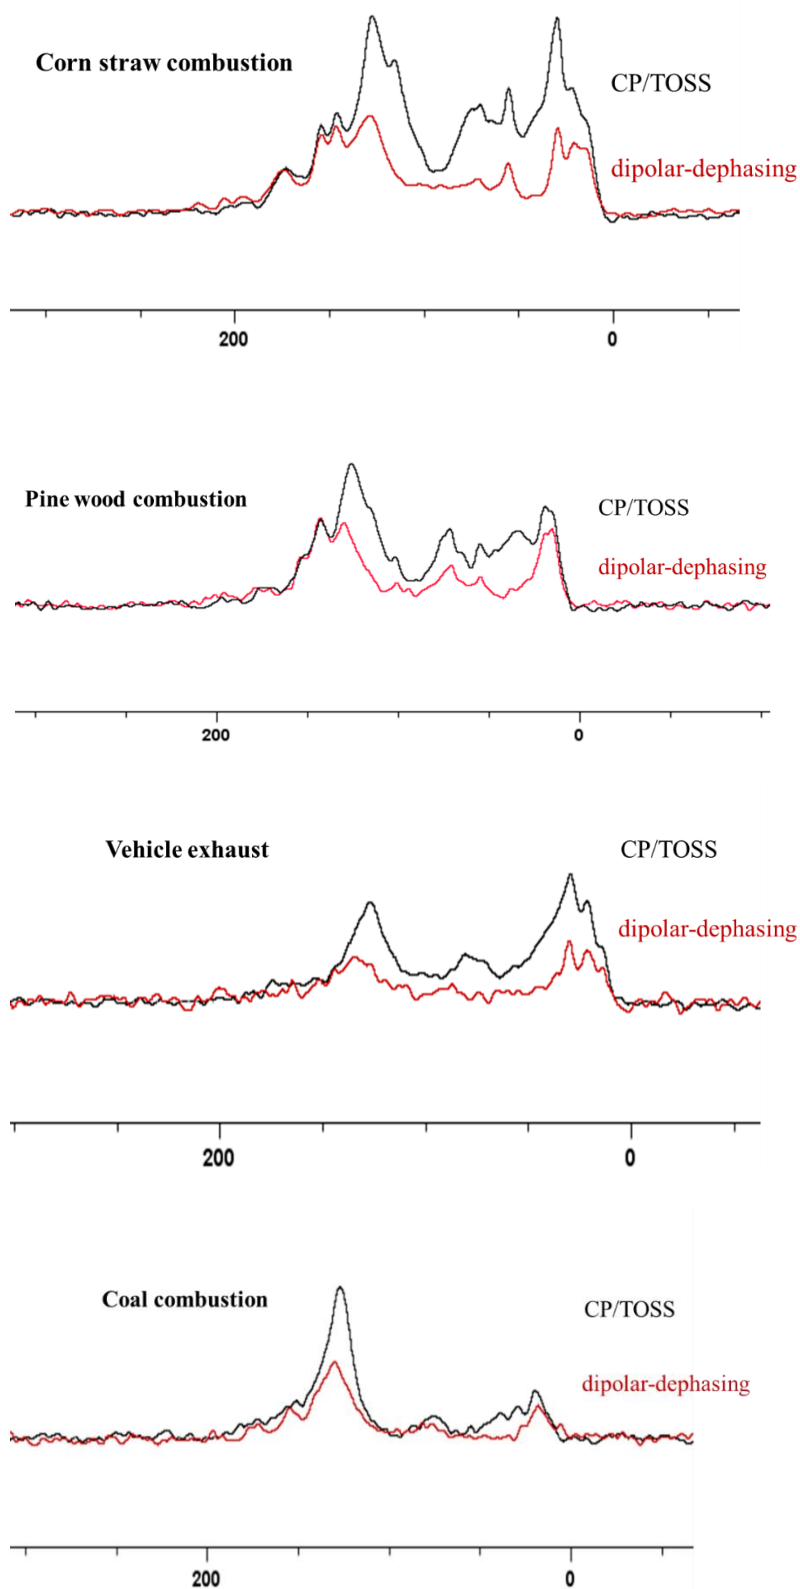

**Figure S2.** Solid-state  $^{13}\text{C}$  NMR spectrum of Corn straw combustion, Pine wood combustion, Vehicle exhaust and Coal combustion.

$^{13}\text{C}$  CP/TOSS and CP/TOSS/DD NMR for the identification of functional groups in the samples. Black lines: CP/TOSS/DD NMR, unselective CP/TOSS spectra. Red lines: CP/TOSS/DD NMR, CP/TOSS with dipolar dephasing to select non-protonated carbons and mobile groups.

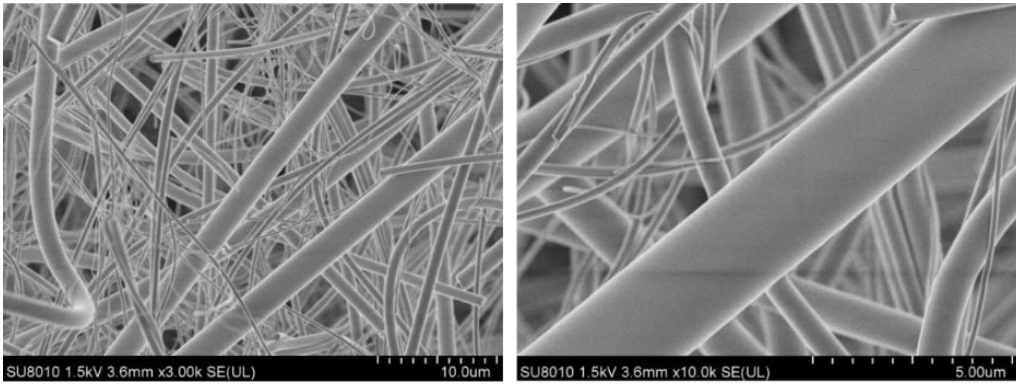

**BLANK**

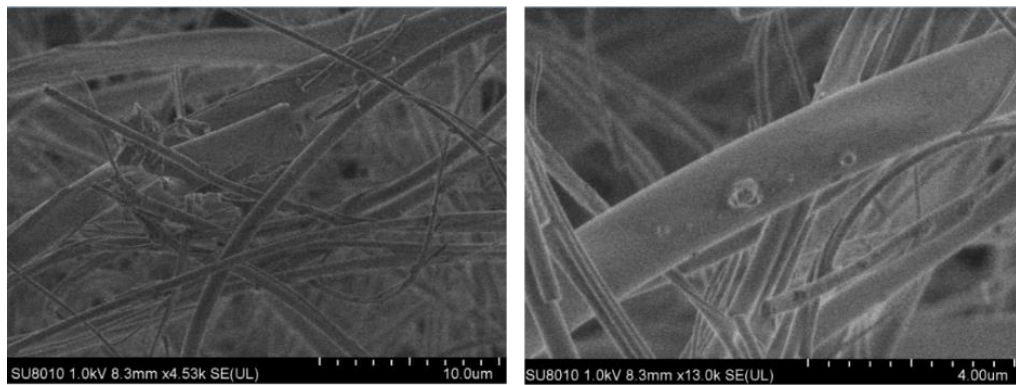

**Corn stem combustion**

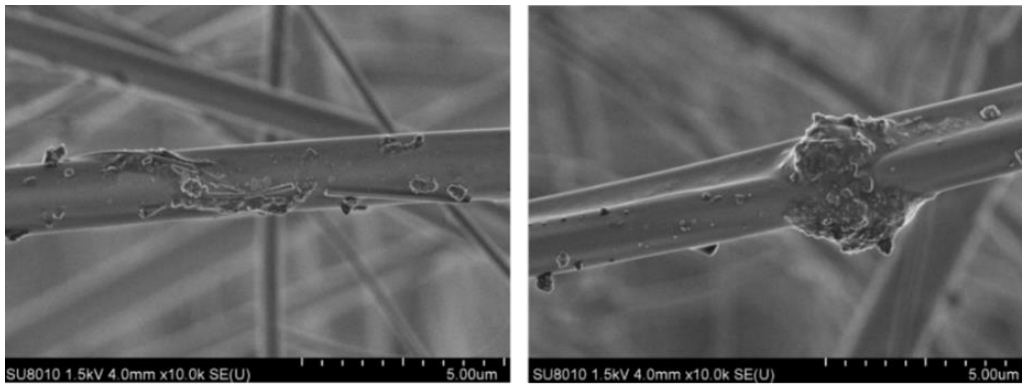

**Pine wood combustion**

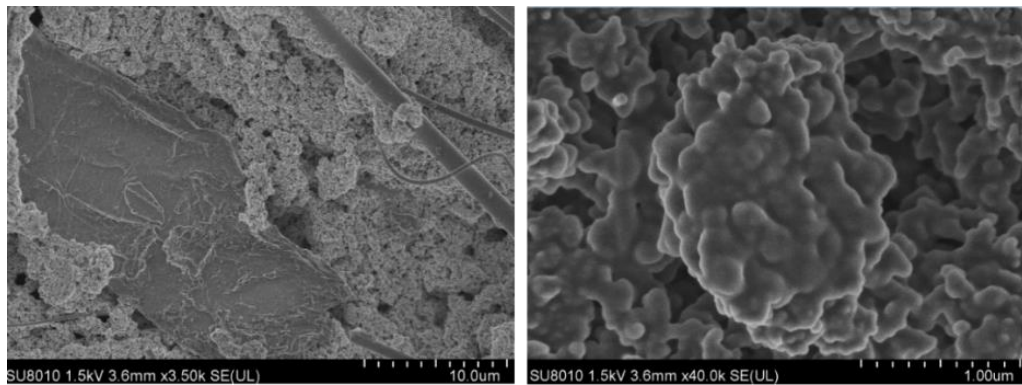

**Vehicle exhaust**

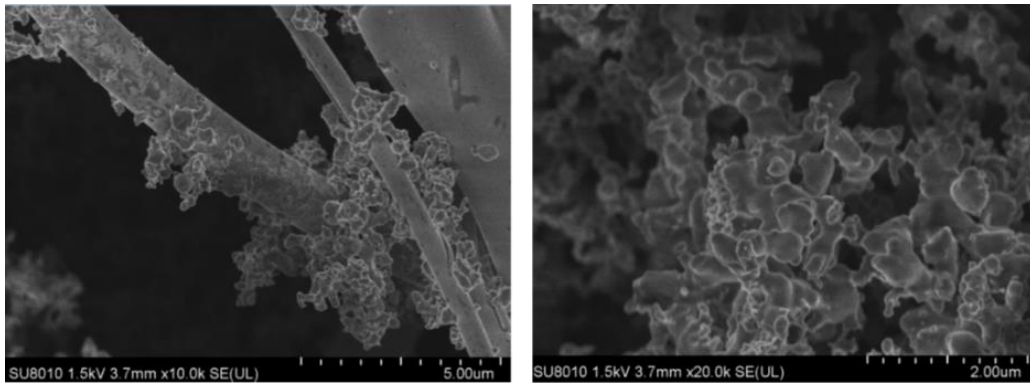

Coal combustion

**Figure S3.** The field emission scanning electron microscopy (FESEM) results of Corn straw combustion, Pine wood combustion, Vehicle exhaust and Coal combustion.

---

## REFERENCES CITED

- Bond, T. C., Streets, D. G., Yarber, K. F., Nelson, S. M., Woo, J. H. and Klimont, Z.: A technology-based global inventory of black and organic carbon emissions from combustion, *J. Geophys. Res.-Atmos.*, 109(D14), 43, doi:10.1029/2003jd003697, 2004.
- Currie, L. A., et al.: A critical evaluation of interlaboratory data on total, elemental, and isotopic carbon in the carbonaceous particle reference material, NIST SRM 1649a, *J. Res. Natl. Inst. Stand. Technol.*, 107(3), 279-298, doi:10.6028/jres.107.022, 2002.
- Heal, M. R., Naysmith, P., Cook, G. T., Xu, S., Duran, T. R., Harrison, R. M.: Application of C-14 analyses to source apportionment of carbonaceous PM<sub>2.5</sub> in the UK, *Atmos. Environ.* 45, (14), 2341-2348, 2011.
- Liu, D., Li, J., Zhang, Y. L., Xu, Y., Liu, X., Ding, P., Shen, C. D., Chen, Y. J., Tian, C. G. and Zhang, G.: The Use of Levoglucosan and Radiocarbon for Source Apportionment of PM<sub>2.5</sub> Carbonaceous Aerosols at a Background Site in East China, *Environ. Sci. Technol.*, 47(18), 10454-10461, doi:10.1021/es401250k, 2013.
- Liu, J. W., Li, J., Ding, P., Zhang, Y. L., Liu, D., Shen, C. D. and Zhang, G.: Optimizing isolation protocol of organic carbon and elemental carbon for C-14 analysis using fine particulate samples, *Atmos. Environ.*, 154, 9-19, doi:10.1016/j.atmosenv.2017.01.027, 2017.
- Maenhaut, W., Raes, N., Chi, X. G., Cafmeyer, J., Wang, W. and Salma, I.: Chemical composition and mass closure for fine and coarse aerosols at a kerbside in Budapest, Hungary, in spring 2002, *X-Ray Spectrom.*, 34(4), 290-296, doi:10.1002/xrs.820, 2005.
- Mao, J.D. and Schmidt-Rohr, K.: Accurate quantification of aromaticity and nonprotonated aromatic carbon fraction in natural organic matter by C-13 solid-state nuclear magnetic resonance, *Environmental Science & Technology*, 38(9): 2680-2684, 2004.
- Reddy, C. M., Pearson, A., Xu, L., McNichol, A. P., Benner, B. A., Wise, S. A., Klouda, G. A., Currie, L. A., Eglinton, T. I.: Radiocarbon as a tool to apportion the sources of polycyclic aromatic hydrocarbons and black carbon in environmental samples, *Environ. Sci. Technol.* 2002, 36, (8), 1774-1782, 2002.
- Salma, I., Chi, X. G. and Maenhaut, W.: Elemental and organic carbon in urban canyon and background environments in Budapest, Hungary, *Atmos. Environ.*, 38(1), 27-36, doi:10.1016/j.atmosenv.2003.09.047, 2004.
- Stevens, N., Lehmann, C. E. R., Murphy, B. P. and Durigan, G.: Savanna woody encroachment is widespread across three continents, *Glob. Change Biol.*, 23(1), 235-244, doi:10.1111/gcb.13409, 2017.
- Streets, D. G., Yarber, K. F., Woo, J. H. and Carmichael, G. R.: Biomass burning in Asia: Annual and seasonal estimates and atmospheric emissions, *Glob. Biogeochem. Cycle*, 17(4), 20, doi:10.1029/2003gb002040, 2003.
- Szidat, S., Jenk, T. M., Gaggeler, H. W., Synal, H. A., Hajdas, I., Bonani, G. and Saurer, M.: THEODORE, a two-step heating system for the EC/OC determination of radiocarbon (C-14) in the environment, *Nucl. Instrum. Methods Phys. Res. Sect. B-Beam Interact. Mater. Atoms*, 223, 829-836, doi:10.1016/j.nimb.2004.04.153, 2004b.
- Xu, X.M., Trumbore, S.E., Zheng, S.H., Southon, J.R., McDuffee, K.E., Luttgen, M. and Liu, J.C.: Modifying a sealed tube zinc reduction method for preparation of



---

AMS graphite targets: Reducing background and attaining high precision, Nuclear Instruments & Methods in Physics Research Section B-Beam Interactions with Materials and Atoms, 259(1): 320-329, 2007.

Zhang, W. M., Brandt, M., Penuelas, J., Guichard, F., Tong, X. Y., Tian, F. and Fensholt, R.: Ecosystem structural changes controlled by altered rainfall climatology in tropical savannas, Nat. Commun., 10, 7, doi:10.1038/s41467-019-08602-6, 2019a.
