# Supplementary material for: Technical note: Intercomparison Study of the EC Radiocarbon Analysis Methods Using Synthetic Known Samples
Source: Copernicus journal article supplement (doi:10.5194/egusphere-2023-379), 2023-03-28
Supplement: Supplementary file [file egusphere-2023-379-RC1-supplement.pdf]

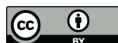

---

1     **Technical note: Intercomparison Study of the EC Radiocarbon Analysis**

2                             **Methods Using Synthetic Known Samples**

3

4     **Xiangyun Zhang<sup>1,2,3</sup>, Jun Li<sup>1,2,3\*</sup>, Sanyuan Zhu<sup>1,2,3</sup>, Junwen Liu<sup>4</sup>, Ping Ding<sup>5</sup>,**  
5     **Shutao Gao<sup>1,2,3</sup>, Chongguo Tian<sup>6</sup>, Yingjun Chen<sup>7</sup>, Ping'an Peng<sup>1,2,3</sup>, Gan**  
6     **Zhang<sup>1,2,3\*</sup>**

7

8     <sup>1</sup> State Key Laboratory of Organic Geochemistry and Guangdong province Key  
9     Laboratory of Environmental Protection and Resources Utilization, Guangzhou  
10    Institute of Geochemistry, Chinese Academy of Sciences, Guangzhou, 510640, China.

11    <sup>2</sup> CAS Center for Excellence in Deep Earth Science, Guangzhou, 510640, China.

12    <sup>3</sup> Guangdong-Hong Kong-Macao Joint Laboratory for Environmental Pollution and  
13    Control, Guangzhou Institute of Geochemistry, Chinese Academy of Science,  
14    Guangzhou 510640, China.

15    <sup>4</sup> Institute for Environmental and Climate Research, Jinan University, Guangzhou,  
16    511443, China.

17    <sup>5</sup> State Key Laboratory of Isotope Geochemistry, Guangzhou Institute of  
18    Geochemistry, Chinese Academy of Sciences, Guangzhou 510640, China.

19    <sup>6</sup> Key Laboratory of Coastal Environmental Processes and Ecological Remediation,  
20    Yantai Institute of Coastal Zone Research, Chinese Academy of Sciences, Yantai,  
21    264003, China.

22    <sup>7</sup> Department of Environmental Science and Engineering, Fudan University, Shanghai,  
23    200438, China.

24    \***Correspondence:** Jun Li (junli@gig.ac.cn), Gan Zhang (zhanggan@gig.ac.cn)

25

26

27

28

29

30

31

32

33

34

35

36

37

38

39

40

41

42

43

44

45

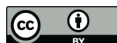

46 **Abstract**

47

48 The accurate identification of elemental carbon (EC) source in aerosol based on  
49 radiocarbon ( $^{14}\text{C}$ ) depends on the method of EC isolation. The lack of aerosol EC  
50 reference materials with "true"  $^{14}\text{C}$  values makes it impossible to evaluate the  
51 accuracy of various methods for the analysis of  $^{14}\text{C}$ -EC in aerosols. In this study, EC  
52 separation methods were evaluated by using samples of mixed biomass burning,  
53 vehicle exhaust and coal-combustion. The results show that  $^{14}\text{C}$ -EC was not only  
54 related to the separation method but also to the types and proportions of biomass  
55 sources in the sample. ~~And the~~ Hydropyrolysis (Hypy) method, which can be used to  
56 separate a highly stable portion of  $\text{EC}_{\text{Hypy}}$  and avoid charring, is a more effective and  
57 stable approach for the matrix-independent  $^{14}\text{C}$  quantification of EC in aerosols. The  
58  $^{13}\text{C}$ - $\text{EC}_{\text{Hypy}}$  and non-fossil  $\text{EC}_{\text{Hypy}}$  values of SRM1649b ~~was~~ 24.9‰ and 11%,  
59 respectively.

60

61

62

63

64

65

66 **1. Introduction**

67

68 The elemental carbon (EC) or black carbon (BC) fraction of carbonaceous aerosols  
69 (CAs) is derived from the incomplete combustion of fossil fuels or biomass and is  
70 responsible for an overall warming effect of the Earth by either absorbing incoming  
71 solar radiation in the atmosphere or reducing the albedo of surface materials (i.e.,  
72 snow and ice) (Fuzzi et al., 2006; Schwarz et al., 2015; Szidat, 2009; Szidat et al.,  
73 2004a; Szidat et al., 2009). The limited understanding of EC aerosol emissions ~~causes~~  
74 poorly constrained anthropogenic climate warming that globally may be second only  
75 to  $\text{CO}_2$  and regionally, such as over East Asia, the dominant driver of climate change  
76 (B. Chen et al., 2013). Therefore, detailed knowledge of the sources of EC is necessary  
77 for the implementation of mitigation strategies for EC reduction. Carbon isotope ( $^{14}\text{C}$   
78 and  $^{13}\text{C}$ ) analysis is a powerful tool for unambiguously distinguishing the carbon  
79 sources of EC (Currie, 2000; Szidat, 2009; Szidat et al., 2009; Gustafsson et al., 2009;  
80 Kirillova et al., 2013; D. Liu et al., 2013; Zencak et al., 2007; X. Y. Zhang et al.,  
81 2019b). Carbon isotope source apportionment requires the physical separation of  $\text{OC}$   
82 and EC, which is complicated by the fact that there is no sharp boundary between  
83 ~~organic carbon (OC)~~ and EC in carbonaceous aerosols (Elmquist et al.,  
84 2006). Therefore, one of the large challenges of this method is the isolation of EC for  
85  $^{14}\text{C}$  and  $^{13}\text{C}$  analysis.

86

87 Based on the thermal stability of EC, several methods for separating OC and EC  
88 from aerosols have been developed. An intercomparison of 9 laboratories for  $^{14}\text{C}$   
89 analysis of carbonaceous aerosol samples was conducted in a previous study, and  $^{14}\text{C}$   
90 analysis of EC revealed a large deviation of 28-79% between the approaches as a  
91 consequence of the different separation techniques (Szidat et al., 2013). Due to the  
92 same principle as aerosol OC and EC measurement, thermo-optical separation, also  
93 named oxygen-based OC-EC separation, has gradually become the main method for  
94 EC separation in recent years. Although the  $^{14}\text{C}$  results of EC between three  
95 independent laboratory methods showed good agreement, the recovery of EC differed  
96 greatly (Zenker et al., 2017). Recently, hydrolysis (Hypy) has been introduced as



97 an EC separation method (Meredith et al., 2012; X.Y. Zhang et al., 2019b). A  
98 comparison study of  $^{14}\text{C}$ -EC in aerosol samples separated using the two-step heating  
99 method (CTO-375),  $\text{EC}_{\text{He}/\text{O}_2-475}$  method and Hypy method was also conducted (X.Y.  
100 Zhang et al., 2019b). However, the  $^{14}\text{C}$  intercomparisons of all studies were mainly  
101 restricted to ambient filter samples or urban dust (SRM 1649a/b), for which the “true”  
102  $^{14}\text{C}$  of EC is not known. As the literature emphasizes (Dasari et al., 2022), even when  
103 methods give similar results, it may still be unclear whether the methods give accurate  
104 results. In the worst case, if the methods give different results, then it is impossible to  
105 determine which method (if any) gives an accurate value (Zenker et al., 2017).  
106 Therefore, the key to evaluating the accuracy of different separation methods is to  
107 obtain suitable EC reference materials for the  $^{14}\text{C}$  analysis of aerosols.  
108

109 Carbonaceous aerosols are mainly composed of primary emissions from fossil fuel  
110 and biomass combustion and secondary organic compounds (Huang et al., 2014; Y.L.  
111 Zhang et al., 2015). In general, secondary organic aerosols are relatively easy to  
112 separate from EC using methods such as water or organic solvent extraction. However,  
113 it is difficult to separate insoluble OC from EC in primary combustion products.  
114 Biomass burning, coal combustion and traffic emissions are the main primary sources  
115 of EC in aerosols (Bond et al., 2013). In this study, six samples were synthesized  
116 artificially by using biomass combustion (corn straw or pine wood), coal combustion  
117 and motor vehicle exhaust samples according to the relative content of fossil carbon  
118 and modern carbon in actual aerosols in this study. The theoretical calculated values  
119 of the EC contents and EC carbon isotopes in six synthetic samples were determined  
120 based on the measured isotopes of each source sample and the EC/TC measured by  
121 using the thermal-optical transmittance (TOT) method. And the calculated  $^{14}\text{C}$  value  
122 of EC can be taken as the “true”  $^{14}\text{C}$ -EC value. Consequently, four EC separation  
123 methods, including Hypy (X.Y. Zhang et al., 2019b), CTO-375 (D. Liu et al., 2013),  
124  $\text{EC}_{\text{He}/\text{O}_2-475}$  (J.W. Liu et al., 2017) and  $\text{EC}_{\text{LARA}}$  (Zenker et al., 2017), were selected for  
125 EC separation, and then the EC contents and EC carbon isotopes were compared to  
126 the corresponding theoretical calculated value of each synthetic sample. The accuracy  
127 of each separation method was evaluated based on the recovery of the EC contents  
128 and carbon isotopes. Finally, the EC contents and EC carbon isotopes ( $^{14}\text{C}$  and  $^{13}\text{C}$ ) of  
129 urban dust (SRM 1649b) were determined by the separation method with the best  
130 accuracy.  
131

## 132 2. Materials and Methods

### 133 2.1. Sample collection

134 Corn straw (*Zea mays*, C4 plant, with carbon isotopes that differ significantly from  
135 fossil fuels), pine wood (*Pinus tabulaeformis* Carr. woody plant), one type of raw coal  
136 in chunks sourced from Yanzhou (YZ) in Shandong Province, and one type of  
137 gasoline truck were selected as the representative sources for biomass burning, coal  
138 combustion and vehicle exhaust. Corn straw and pine wood combustion products  
139 were collected through a sampling system. Coal was combusted in a high-efficiency  
140 stove, and  $\text{PM}_{2.5}$  emissions were collected using a dilution sampling system. Vehicle  
141 exhaust particles were collected using the on-board emission measurement system. A  
142 description of the detailed sampling information was provided in a previous report.[X  
143 Y Zhang et al., 2019b]  
144  
145  
146



147 **2.2. EC Purification Method**

148

149 **CTO-375 method:** To achieve the complete removal of the OC from the EC<sub>CTO375</sub>  
150 fraction, the samples were treated by vaporizing the OC at 375 °C in a muffle furnace  
151 in the presence of air using a shorter separation time of 4 h (D. Liu et al., 2013).

152

153 **EC<sub>He/O2-475</sub> method:** The EC<sub>He/O2-475</sub> fractions in the samples were purified in the  
154 commercial OC-EC analyzer as follows: 120 s at 200 °C, 150 s at 300 °C, and 180 s at  
155 475 °C in an oxidative atmosphere (10% oxygen, 90% helium), followed by 180 s at  
156 650 °C in helium. Details of the handling methods were described in a previous report  
157 (J.W. Liu et al., 2017).

158

159 **EC<sub>LARA</sub> method:** A punch of the water-extracted filter was treated with a  
160 thermo-optical OC-EC analyzer using the first three steps of the “Swiss 4S protocol”  
161 to remove all remaining water-insoluble OC, giving a residue that constituted the  
162 EC<sub>LARA</sub> sample (Zenker et al., 2017; Y.L. Zhang et al., 2015).

163

164 **Hydropyrolysis:** Each sample was mixed fully with ammonium  
165 dioxodithiomolybdate [(NH<sub>4</sub>)<sub>2</sub>MoO<sub>2</sub>S<sub>2</sub>] as a catalyst to reach a nominal molybdenum  
166 loading of 1% by weight. The samples were first heated in the reactor tube from  
167 ambient temperature to 250 °C at a rate of 300 °C min<sup>-1</sup> and then from 300 °C to the  
168 final temperature (550 °C) at 8 °C min<sup>-1</sup>; samples were then held for 5 min under a  
169 hydrogen pressure of 15 MPa and a flow rate of 5.0 L/min. The resulting residue was  
170 the EC<sub>Hypy</sub> sample (X.Y. Zhang et al., 2019b).

171

172 **2.3. OC/EC and carbon isotopes analysis**

173

174 The OC and EC were analyzed by a laboratory OC/EC analyzer (Sunset Laboratory,  
175 USA) using the NIOSH2 thermal protocol (Maenhaut et al., 2005; Salma et al., 2004).  
176 Methods of <sup>13</sup>C and <sup>14</sup>C analysis for all samples were described in the SI (D. Liu et al.,  
177 2013; J.W. Liu et al., 2017).

178

179 **3. Results and discussion**

180

181 **3.1. Comparison of EC purified by different methods**

182

183 The six synthetic known samples were made by biomass combustion (corn straw or  
184 pine wood), coal combustion and motor vehicle exhaust (Table S1). The hybrid  
185 samples were produced according to the proportioning principle, based on the  
186 approximate proportions (Figure S1 and Table S2). The average deviations of carbon  
187 content, <sup>13</sup>C<sub>TC</sub> and *f<sub>M</sub>*(TC) of the hybrid samples between the theoretical values and  
188 the test values were 0.30%, 0.12% and 0.03, respectively (Table S3), and there was  
189 no significant difference (T-test, P=0.77, 0.96 and 0.49, respectively). These results  
190 show that the samples were well mixed and were sufficient to use for the method  
191 comparison experiments.

192

193 Before comparing EC recovery rates, it is necessary to obtain relatively accurate  
194 EC concentrations. The EC/TC ratios of the four combustion source samples were  
195 analyzed by the TOT method (Table S4). The EC/TC results of the four combustion  
196 source samples processed using the four separation methods (Hypy, CTO-375,



197 EC<sub>He/O2-475</sub> and EC<sub>LARA</sub>) are listed in Table S4. Compared with the TOT method, the  
198 amount of EC obtained by the CTO-375 method is obviously lower than the results of  
199 the other three methods. For example, due to the high content of soot in the vehicle  
200 exhaust, the amount of EC can reach about 20%, while the amount of EC in other  
201 source samples is less than 10% (Hammes et al., 2007). It indicates that the CTO-375  
202 method has obvious defects in the quantitative analysis of black carbon isotopes in  
203 aerosols. The EC/TC ratios of the coal combustion and motor vehicle exhaust  
204 obtained by the other three methods are lower than those of the TOT method, and the  
205 EC/TC ratios of the pine burning samples are higher than those of the TOT method.  
206 Among the above four methods, the result obtained by the Hypy method is the closest  
207 to the result of the TOT method. For the corn straw combustion samples, the Hypy  
208 and EC<sub>LARA</sub> methods are lower than the TOT method, but the results obtained by the  
209 EC<sub>He/O2-475</sub> are higher than the TOT method. On the one hand, this difference is the  
210 problem of the method itself. Each method only obtains a specific part of the EC  
211 continuum, rather than all the components of the black carbon continuum (Currie et  
212 al., 2002; de la Rosa et al., 2011; Schmidt et al., 2001). On the other hand, the  
213 different separation effect of the method is due to the difference of the organic carbon  
214 structure in the source sample.

215  
216 Nuclear Magnetic Resonance (NMR) spectroscopy is an essential tool for acquiring  
217 detailed structural characterization results of the complex natural organic matter. The  
218 four combustion source samples were characterized by using solid-state <sup>13</sup>C NMR  
219 (Figure S2 and Table S5). The <sup>13</sup>C NMR results show that the average lower limit  
220 estimate for organic oxygen (Kelemen et al., 2010) from biomass combustion is 37%  
221 higher than that for fossil combustion. This finding indicates that there are more  
222 oxygen-containing organic carbon components in biomass combustion samples. The  
223 more organic oxygen in the sample, the greater the sample's polarity, which  
224 contributes to the increased fraction of water-soluble components in biomass  
225 combustion than in fossil combustion samples. In the absence of oxygen, using an  
226 aromatization process based on the cleavage of O-alkylated carbons might  
227 overestimate the EC content analyzed by thermal-optical methods (Li et al., 2013).  
228 The fraction of methyls in the aliphatics (FMA) (J. Chen et al., 2020) and  
229 nonprotonated aromatics (Kelemen et al., 2010) in pine wood combustion are 22%  
230 and 12% higher, respectively, than those in corn straw. These findings indicate that the  
231 water solubility of pine wood combustion products is worse than that of corn straw, in  
232 addition to the fact that the aromatic structure of pine wood combustion materials is  
233 denser. The water-soluble components of the corn straw combustion products were  
234 high, such that OC charring has a greatly influenced EC separation when using the  
235 EC<sub>He/O2-475</sub> method, while minimally impacting EC separation following water  
236 extraction EC<sub>LARA</sub> methods (Y. L. Zhang et al., 2012).

237  
238 By using field emission scanning electron microscopy (FESEM) in this study  
239 (Figure S3), it was observed that the pine wood samples contained a coke structure  
240 that was more compact than the structure of the corn straw samples. In addition, a  
241 large number of soot structures were observed in the fossil source samples, indicating  
242 that fossil source samples are more compact than biomass samples.

243  
244 In general, due to the differences between the separation technologies, the EC/TC  
245 ratios of the six synthetic known samples (Table S4) revealed a deviation of  
246 approximately -98%~125% between the calculated EC/TC ratios and the EC/TC



247 ratios separated by the four methods. The deviations separated by the Hypy,  $EC_{LARA}$ ,  
248  $EC_{He/O2-475}$  and CTO-375 methods were approximately -8%~31%, -39%~121%,  
249 -62%~125% and -93%~ -95%, respectively. The result obtained by the Hypy method  
250 is closest to the TOT method, and the average value of the ratio is 1.1, which shows  
251 the advantages of stability and reliability in purifying EC.

### 252 3.2. Comparison of carbon isotopes in EC

253  
254  
255 The different EC recoveries of the source samples may lead to different carbon  
256 isotope results in the EC from the synthetic known samples. The theoretical EC/TC  
257 ratios and  $^{13}C_{EC}$  values of each hybrid sample were calculated according to the EC/TC  
258 (TOT) ratios and  $^{13}C_{TC}$  values in the combustion source and the relative proportion of  
259 each source, respectively (Table S3). In the calculation, it is assumed that the  $^{13}C$   
260 value in the EC is **the same as that in the TC in each source sample**. The  $^{13}C$  results of  
261 the EC from the six synthetic known samples processed by the four separation  
262 methods are shown in Table 1. No significant difference of  $^{13}C$  was observed between  
263 the results of the four separation methods and the corresponding theoretical  
264 calculation values of all samples (T-test,  $P>0.05$ ), except for the samples (S1, S2 and  
265 S3) containing corn straw combustion material separated using the  $EC_{He/O2-475}$  method,  
266 which presented much higher  $^{13}C$  values. This finding indicated that the EC separated  
267 using the  $EC_{He/O2-475}$  method contained more biomass carbon. The reason for this  
268 result may be that the organic carbon of combusted corn straw is charring during the  
269 EC separation process. However, this phenomenon was not observed in the samples  
270 containing pine wood combustion, which may be the reason that the  $^{13}C$  value of the  
271 pine wood combustion sample is close to that of coal combustion.

272  
273 The  $^{14}C$  results of the EC are shown in Table 1 and Figure 1. Fraction of Modern  
274 ( $f_M$ ) is used to express the proportion of biomass burning. The theoretical values of  
275  $f_M(EC)$  in the hybrid samples were obtained according to the proportion of fossil  
276 carbon and modern carbon in each sample in accordance with the EC/TC (TOT) ratios  
277 (Figure 1). The results show that the  $f_M$  values obtained by different separation  
278 methods are quite different, and are generally affected by the ratios of combustion  
279 source sample EC recovered by different methods. Due to the low recovery rate of EC  
280 by CTO-375 method, the  $f_M(EC_{CTO-375})$  value is irregular ~~to follow~~. Generally, the  
281  $f_M(EC_{CTO-375})$  value obtained by this method is more than twice the theoretical value.  
282 For the  $EC_{He/O2-475}$  method, due to the influence of biomass burning OC coking, the  
283  $f_M(EC_{He/O2-475})$  value obtained by this method deviates greatly from the theoretical  
284 value. On the whole,  $f_M$  values obtained by the Hypy and  $EC_{LARA}$  methods are  
285 relatively close to the theoretical values, but the two methods have their own  
286 advantages in the two different sets of samples. For the combustion of herbaceous  
287 plants, the Hypy method has a low EC recovery rate for such source samples,  
288 resulting in a small  $f_M$  value. For the combustion of woody combustion, due to the  
289 higher EC recovery rate by the Hypy method, the  $f_M(EC_{Hypy})$  value is slightly higher  
290 than that of samples containing herbaceous plants. For the  $EC_{LARA}$  method, in the first  
291 group of samples with corn straw combustion, the EC recovery rate of each source  
292 sample is lower than the theoretical value, so that the  $f_M(EC_{LARA})$  value obtained by  
293 this method is the closest to the theoretical value. However, in the second group of  
294 samples containing woody combustion, the  $f_M(EC_{LARA})$  value obtained by this method



295 was significantly higher than the theoretical value, due to the higher recovery rate of  
296 woody combustion EC by the EC<sub>LARA</sub> method. The results show that the  $f_M$  value of  
297 EC was not only related to the separation method but also to the types and proportions  
298 of biomass sources in the sample.  
299

300 The above results show that the type of biomass combustion affects the efficiency  
301 of the separation method to purify black carbon and the accuracy of the radiocarbon  
302 test results. Charcoal, harvest residues and wood materials are the most common  
303 biomass fuels used as energy sources (Anenberg et al., 2013). From a global  
304 perspective, the types of biomass fuels are complex, but generally can be divided into  
305 two categories, herbaceous burning and woody plant burning, the ratio of the two  
306 types of biomass is about 58:42 (Table S6). Different regions have different  
307 proportions. According to the literature (Bond et al., 2004; Stevens et al., 2017;  
308 Streets et al., 2003; W.M. Zhang et al., 2019a), developed countries, such as Europe  
309 and North America, have a relatively high proportion of woody plants, while  
310 developing countries, such as Africa and Asia, have a relatively high proportion of  
311 herbaceous plants (Table S6). According to the recovery rate of different types of  
312 biomass combustion EC by different methods, the deviations that may be caused by  
313 the results of testing  $^{14}\text{C}$  in different regions are estimated. The results are listed in  
314 Table S6. It can be seen that on a global scale, the  $f_M$  value obtained by the Hypy  
315 method is the closest to the theoretical value. Therefore, the Hypy method is an  
316 effective and stable approach for matrix-independent  $^{14}\text{C}$  quantification of EC  
317 avoiding charring in aerosols.  
318

### 319 3.3. Carbon isotopes of EC in SRM 1649b

320  
321 SRM 1649a/b, urban dust, was used to check the quality of EC or EC isotope  
322 measurement method (D. Liu et al., 2013; Szidat et al., 2004b; Reddy et al., 2002;  
323 Heal et al., 2011). SRM 1649b was prepared from the same particulate material that  
324 was issued in 1982 as SRM 1649 and re-issued in 1999 as SRM 1649a, and the only  
325 difference is that the bulk material was sieved to a smaller particle size fraction <sup>47</sup>.  
326 Therefore, the  $f_M$  and  $\delta^{13}\text{C}$  of TC in SRM 1649b obtained in this study was consistent  
327 with SRM 1649a reported by Szidat et al (Szidat et al., 2004b). EC/TC ratios,  $f_M$ -EC  
328 and  $\delta^{13}\text{C}$ -EC of SRM1649b separated using Hypy method in this study and archived  
329 data of the literatures using different separation methods are listed in Table S7. The  
330 EC/TC ratios varied from 7.5% to 46% determined by the different analyzing  
331 methods. However, the value of about ~28% obtained in this study is in good  
332 agreement with that obtained by Hypy method (Meredith et al., 2012) and by TOT  
333 method (Currie et al., 2002). The  $f_M$  and  $\delta^{13}\text{C}$  of EC in SRM 1649a ranged from 0.038  
334 to 0.153 and from -26.55‰ to -24.8 ‰ respectively reported by the previous research  
335 using the different separation methods except Hypy (Currie et al., 2002). The  
336 corresponding values of 0.11 and -24.9 ‰ treated by Hypy method in this study are  
337 just in the range of archived data. Therefore, the values of  $^{13}\text{C}$  and  $^{14}\text{C}$  of EC<sub>Hypy</sub> in  
338 SRM 1649b provide a definite and comparable reference for the future research  
339 methods.  
340

### 341 4. Conclusions

342  
343 Carbon isotope ( $^{14}\text{C}$  and  $^{13}\text{C}$ ) analysis is a powerful tool for distinguishing the  
344 carbon sources of carbonaceous aerosols. As addressed in this work, one main



345 challenge of this method is the isolation of EC or BC for carbon isotope analysis. In  
346 this study, six synthetic known samples were collected, including biomass combustion  
347 (corn straw or pine wood) and coal combustion products and motor vehicle exhaust.  
348 These samples were then used to evaluate four EC separation methods, which  
349 included the Hypy, CTO-375,  $EC_{He/O_2-475}$  and  $EC_{LARA}$  methods. The results  
350 demonstrated the Hypy method was in good agreement with the thermo-optical (TOT)  
351 method for the quantification of EC. And the  $EC_{f_M}$  values depended not only on the  
352 separation method but also on the types and proportions of the biomass sources in the  
353 samples. The Hypy method is the most appropriate EC separation method of the four  
354 methods reported here, followed by the  $EC_{LARA}$  method. The Hypy method, which  
355 can be used to separate a highly stable portion of  $EC_{Hypy}$  and avoid charring, is a more  
356 effective and stable approach for the matrix-independent  $^{14}C$  quantification of EC in  
357 aerosols. The  $EC_{Hypy}$  of SRM1649b sample was separated by the Hypy method. The  
358 results indicated that the  $^{13}C-EC_{Hypy}$  and non-fossil  $EC_{Hypy}$  values of SRM1649b was  
359 24.9% and 11%, respectively. This result can provide **participation** value for other  
360 separation methods.

361  
362

### 363 **Supporting Information**

364 Supporting Information may be found in the online version of this article.

365  
366

### 367 **Acknowledgments**

368 This work was supported by the National Natural Science Foundation of China (grant  
369 nos. 42192510, 42030715 and 41977177), Guangdong Foundation for Program of  
370 Science and Technology Research (grant nos. 2019B121205006 and  
371 2020B1212060053) and Guangzhou Foundation for Program of Science and  
372 Technology Research (grant no. 202102080251).

373  
374

### 374 **Author contributions**

375 GZ led the study. JL and XZ designed the study, developed the analysis protocols, and  
376 wrote the initial manuscript. XZ, SZ, JL, PD, SG, CT, YC and PP provided data,  
377 provided comments on the analysis, and contributed and reviewed the final  
378 manuscript.

379  
380

### 380 **Competing interests**

381 The authors declare that they have no conflict of interest.

382  
383

### 383 **References**

- 384 Anenberg, S. C., Balakrishnan, K., Jetter, J., Masera, O., Mehta, S., Moss, J. and  
385 Ramanathan, V.: Cleaner Cooking Solutions to Achieve Health, Climate, and  
386 Economic Cobenefits, *Environ. Sci. Technol.*, 47(9), 3944-3952,  
387 doi:10.1021/es304942e, 2013.
- 388 Bond, T. C., et al.: Bounding the role of black carbon in the climate system: A  
389 scientific assessment, *J. Geophys. Res.-Atmos.*, 118(11), 5380-5552,  
390 doi:10.1002/jgrd.50171, 2013.
- 391 Bond, T. C., Streets, D. G., Yarber, K. F., Nelson, S. M., Woo, J. H. and Klimont, Z.: A  
392 technology-based global inventory of black and organic carbon emissions  
393 from combustion, *J. Geophys. Res.-Atmos.*, 109(D14), 43,





- 394 doi:10.1029/2003jd003697, 2004.
- 395 Chen, B., et al.: Source Forensics of Black Carbon Aerosols from China, *Environ. Sci.*  
396 *Technol.*, 47(16), 9102-9108, doi:10.1021/es401599r, 2013.
- 397 Chen, J., Jia, W. L., Yu, C. L., Zhang, X. Y. and Peng, P. A.: Bound hydrocarbons and  
398 structure of pyrobitumen rapidly formed by asphaltene cracking: Implications  
399 for oil-source correlation, *Org. Geochem.*, 146, 16,  
400 doi:10.1016/j.orggeochem.2020.104053, 2020.
- 401 Currie, L. A.: Evolution and multidisciplinary frontiers of C-14 aerosol science,  
402 *Radiocarbon*, 42(1), 115-126, 2000.
- 403 Currie, L. A., et al.: A critical evaluation of interlaboratory data on total, elemental,  
404 and isotopic carbon in the carbonaceous particle reference material, NIST  
405 SRM 1649a, *J. Res. Natl. Inst. Stand. Technol.*, 107(3), 279-298,  
406 doi:10.6028/jres.107.022, 2002.
- 407 Dasari, S., Widory, D.: Radiocarbon (<sup>14</sup>C) Analysis of Carbonaceous Aerosols:  
408 Revisiting the Existing Analytical Techniques for Isolation of Black Carbon,  
409 *Front. Environ. Sci.*, 10, 907467, doi: 10.3389/fenvs.2022.907467, 2022.
- 410 de la Rosa, J. M., Garcia, L. S., de Andres, J. R., Gonzalez-Vila, F. J., Gonzalez-Perez,  
411 J. A. and Knicker, H.: Contribution of black carbon in recent sediments of the  
412 Gulf of Cadiz: Applicability of different quantification methodologies, *Quat.*  
413 *Int.*, 243(2), 264-272, doi:10.1016/j.quaint.2011.01.034, 2011.
- 414 Elmquist, M., Cornelissen, G., Kukulska, Z. and Gustafsson, O.: Distinct oxidative  
415 stabilities of char versus soot black carbon: Implications for quantification and  
416 environmental recalcitrance, *Glob. Biogeochem. Cycle*, 20(2), 11,  
417 doi:10.1029/2005gb002629, 2006.
- 418 Fuzzi, S., et al.: Critical assessment of the current state of scientific knowledge,  
419 terminology, and research needs concerning the role of organic aerosols in the  
420 atmosphere, climate, and global change, *Atmos. Chem. Phys.*, 6, 2017-2038,  
421 doi:10.5194/acp-6-2017-2006, 2006.
- 422 Gustafsson, O., Krusa, M., Zencak, Z., Sheesley, R. J., Granat, L., Engstrom, E.,  
423 Praveen, P. S., Rao, P. S. P., Leck, C. and Rodhe, H.: Brown Clouds over  
424 South Asia: Biomass or Fossil Fuel Combustion?, *Science*, 323(5913),  
425 495-498, doi:10.1126/science.1164857, 2009.
- 426 Hammes, K., et al.: Comparison of quantification methods to measure fire-derived  
427 (black/elemental) carbon in soils and sediments using reference materials from  
428 soil, water, sediment and the atmosphere, *Glob. Biogeochem. Cycle*, 21(3), 18,  
429 doi:10.1029/2006gb002914, 2007.
- 430 Huang, R. J., et al.: High secondary aerosol contribution to particulate pollution  
431 during haze events in China, *Nature*, 514(7521), 218-222,  
432 doi:10.1038/nature13774, 2014.
- 433 Kelemen, S. R., et al.: Characterization of solid bitumens originating from thermal  
434 chemical alteration and thermochemical sulfate reduction, *Geochim.*  
435 *Cosmochim. Acta*, 74(18), 5305-5332, doi:10.1016/j.gca.2010.06.013, 2010.
- 436 Kirillova, E. N., Andersson, A., Sheesley, R. J., Krusa, M., Praveen, P. S., Budhavant,  
437 K., Safai, P. D., Rao, P. S. P. and Gustafsson, O.: C-13- and C-14-based study



- 438 of sources and atmospheric processing of water-soluble organic carbon  
439 (WSOC) in South Asian aerosols, *J. Geophys. Res.-Atmos.*, 118(2), 614-626,  
440 doi:10.1002/jgrd.50130, 2013.
- 441 Li, X. M., Shen, Q. R., Zhang, D. Q., Mei, X. L., Ran, W., Xu, Y. C. and Yu, G. H.:  
442 Functional Groups Determine Biochar Properties (pH and EC) as Studied by  
443 Two-Dimensional C-13 NMR Correlation Spectroscopy, *PLoS One*, 8(6), 7,  
444 doi:10.1371/journal.pone.0065949, 2013.
- 445 Liu, D., Li, J., Zhang, Y. L., Xu, Y., Liu, X., Ding, P., Shen, C. D., Chen, Y. J., Tian, C.  
446 G. and Zhang, G.: The Use of Levoglucosan and Radiocarbon for Source  
447 Apportionment of PM<sub>2.5</sub> Carbonaceous Aerosols at a Background Site in East  
448 China, *Environ. Sci. Technol.*, 47(18), 10454-10461, doi:10.1021/es401250k,  
449 2013.
- 450 Liu, J. W., Li, J., Ding, P., Zhang, Y. L., Liu, D., Shen, C. D. and Zhang, G.:  
451 Optimizing isolation protocol of organic carbon and elemental carbon for C-14  
452 analysis using fine particulate samples, *Atmos. Environ.*, 154, 9-19,  
453 doi:10.1016/j.atmosenv.2017.01.027, 2017.
- 454 Maenhaut, W., Raes, N., Chi, X. G., Cafmeyer, J., Wang, W. and Salma, I.: Chemical  
455 composition and mass closure for fine and coarse aerosols at a kerbside in  
456 Budapest, Hungary, in spring 2002, *X-Ray Spectrom.*, 34(4), 290-296,  
457 doi:10.1002/xrs.820, 2005.
- 458 Meredith, W., Ascough, P. L., Bird, M. I., Large, D. J., Snape, C. E., Sun, Y. and  
459 Tilston, E. L.: Assessment of hydrolysis as a method for the quantification  
460 of black carbon using standard reference materials, *Geochim. Cosmochim.  
461 Acta*, 97, 131-147, doi:10.1016/j.gca.2012.08.037, 2012.
- 462 Salma, I., Chi, X. G. and Maenhaut, W.: Elemental and organic carbon in urban  
463 canyon and background environments in Budapest, Hungary, *Atmos. Environ.*,  
464 38(1), 27-36, doi:10.1016/j.atmosenv.2003.09.047, 2004.
- 465 Schmidt, M. W. I., Skjemstad, J. O., Czimczik, C. I., Glaser, B., Prentice, K. M.,  
466 Gelinás, Y. and Kuhlbusch, T. A. J.: Comparative analysis of black carbon in  
467 soils, *Glob. Biogeochem. Cycle*, 15(1), 163-167, doi:10.1029/2000gb001284,  
468 2001.
- 469 Schwarz, J. P., Holloway, J. S., Katich, J. M., McKeen, S., Kort, E. A., Smith, M. L.,  
470 Ryerson, T. B., Sweeney, C. and Peischl, J.: Black Carbon Emissions from the  
471 Bakken Oil and Gas Development Region, *Environ. Sci. Technol. Lett.*, 2(10),  
472 281-285, doi:10.1021/acs.estlett.5b00225, 2015.
- 473 Stevens, N., Lehmann, C. E. R., Murphy, B. P. and Durigan, G.: Savanna woody  
474 encroachment is widespread across three continents, *Glob. Change Biol.*,  
475 23(1), 235-244, doi:10.1111/gcb.13409, 2017.
- 476 Streets, D. G., Yarber, K. F., Woo, J. H. and Carmichael, G. R.: Biomass burning in  
477 Asia: Annual and seasonal estimates and atmospheric emissions, *Glob.  
478 Biogeochem. Cycle*, 17(4), 20, doi:10.1029/2003gb002040, 2003.
- 479 Szidat, S.: ATMOSPHERE Sources of Asian Haze, *Science*, 323(5913), 470-471,  
480 doi:10.1126/science.1169407, 2009.
- 481 Szidat, S., et al.: INTERCOMPARISON OF C-14 ANALYSIS OF



- 482 CARBONACEOUS AEROSOLS: EXERCISE 2009, *Radiocarbon*, 55(2-3),  
483 1496-1509, doi:10.2458/azu\_js\_rc.55.16314, 2013.
- 484 Szidat, S., et al.: Radiocarbon (C-14)-deduced biogenic and anthropogenic  
485 contributions to organic carbon (OC) of urban aerosols from Zurich,  
486 Switzerland, *Atmos. Environ.*, 38(24), 4035-4044,  
487 doi:10.1016/j.atmosenv.2004.03.066, 2004a.
- 488 Szidat, S., Jenk, T. M., Gaggeler, H. W., Synal, H. A., Hajdas, I., Bonani, G. and  
489 Saurer, M.: THEODORE, a two-step heating system for the EC/OC  
490 determination of radiocarbon (C-14) in the environment, *Nucl. Instrum.*  
491 *Methods Phys. Res. Sect. B-Beam Interact. Mater. Atoms*, 223, 829-836,  
492 doi:10.1016/j.nimb.2004.04.153, 2004b.
- 493 Szidat, S., M. Ruff, Perron, N., Wacker, L., Synal, H. A., Hallquist, M., Shannigrahi,  
494 A. S., Yttri, K. E., Dye, C. and Simpson, D.: Fossil and non-fossil sources of  
495 organic carbon (OC) and elemental carbon (EC) in Goteborg, Sweden, *Atmos.*  
496 *Chem. Phys.*, 9(5), 1521-1535, doi:10.5194/acp-9-1805-2009, 2009.
- 497 Zencak, Z., Elmquist, M. and Gustafsson, O.: Quantification and radiocarbon source  
498 apportionment of black carbon in atmospheric aerosols using the CTO-375  
499 method, *Atmos. Environ.*, 41(36), 7895-7906,  
500 doi:10.1016/j.atmosenv.2007.06.006, 2007.
- 501 Zenker, K., Vonwiller, M., Szidat, S., Calzolari, G., Giannoni, M., Bernardoni, V.,  
502 Jedynska, A. D., Henzing, B., Meijer, H. A. J. and Dusek, U.: Evaluation and  
503 Inter-Comparison of Oxygen-Based OC-EC Separation Methods for  
504 Radiocarbon Analysis of Ambient Aerosol Particle Samples, *Atmosphere*,  
505 8(11), 21, doi:10.3390/atmos8110226, 2017.
- 506 Zhang, W. M., Brandt, M., Penuelas, J., Guichard, F., Tong, X. Y., Tian, F. and  
507 Fensholt, R.: Ecosystem structural changes controlled by altered rainfall  
508 climatology in tropical savannas, *Nat. Commun.*, 10, 7,  
509 doi:10.1038/s41467-019-08602-6, 2019a.
- 510 Zhang, X. Y., et al.: Isolation and radiocarbon analysis of elemental carbon in  
511 atmospheric aerosols using hydrolysis, *Atmos. Environ.*, 198, 381-386,  
512 doi:10.1016/j.atmosenv.2018.11.005, 2019b.
- 513 Zhang, Y. L., Perron, N., Ciobanu, V. G., Zotter, P., Minguillon, M. C., Wacker, L.,  
514 Prevot, A. S. H., Baltensperger, U. and Szidat, S.: On the isolation of OC and  
515 EC and the optimal strategy of radiocarbon-based source apportionment of  
516 carbonaceous aerosols, *Atmos. Chem. Phys.*, 12(22), 10841-10856,  
517 doi:10.5194/acp-12-10841-2012, 2012.
- 518 Zhang, Y. L., Schnelle-Kreis, J., Abbaszade, G., Zimmermann, R., Zotter, P., Shen, R.,  
519 R., Schafer, K., Shao, L. Y., Prevot, A. S. H. and Szidat, S.: Source  
520 Apportionment of Elemental Carbon in Beijing, China: Insights from  
521 Radiocarbon and Organic Marker Measurements, *Environ. Sci. Technol.*,  
522 49(14), 8408-8415, doi:10.1021/acs.est.5b01944, 2015.
- 523 NIST: Certificate of Analysis for Standard Reference Material 1649b, Urban Dust;  
524 National Institute of Standards and Technology: Gaithersburg, MD, 2007.

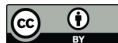

525  
526

**Table 1.** The  $\delta^{13}\text{C}$  and  $^{14}\text{C}$  results of EC from the six synthetic known samples by four separation methods.

| Sample | $\delta^{13}\text{C}_{\text{‰}}(\text{EC})$<br>(calculated) | $f_{\text{M}}(\text{EC})$<br>(calculated) | $\delta^{13}\text{C}_{\text{‰}}(\text{EC}_{\text{Hyp}})$<br>( $\pm 0.5 \text{ ‰}$ ) | $f_{\text{M}}(\text{EC}_{\text{Hyp}})$ | $\delta^{13}\text{C}_{\text{‰}}(\text{EC}_{\text{CTO-375}})$<br>( $\pm 0.5 \text{ ‰}$ ) | $f_{\text{M}}(\text{EC}_{\text{CTO-375}})$ | $\delta^{13}\text{C}_{\text{‰}}(\text{EC}_{\text{He-02-475}})$<br>( $\pm 0.5 \text{ ‰}$ ) | $f_{\text{M}}(\text{EC}_{\text{He-02-475}})$ | $\delta^{13}\text{C}_{\text{‰}}(\text{EC}_{\text{LARA}})$<br>( $\pm 0.5 \text{ ‰}$ ) | $f_{\text{M}}(\text{EC}_{\text{LARA}})$ |
|--------|-------------------------------------------------------------|-------------------------------------------|-------------------------------------------------------------------------------------|----------------------------------------|-----------------------------------------------------------------------------------------|--------------------------------------------|-------------------------------------------------------------------------------------------|----------------------------------------------|--------------------------------------------------------------------------------------|-----------------------------------------|
| S1     | -22.98                                                      | 0.2192                                    | -23.40                                                                              | 0.0946 $\pm$ 0.0013                    | -22.26                                                                                  | 0.4027 $\pm$ 0.0145                        | -19.69                                                                                    | 0.3378 $\pm$ 0.0025                          | -23.55                                                                               | 0.2140 $\pm$ 0.0023                     |
| S2     | -22.77                                                      | 0.2795                                    | -23.42                                                                              | 0.1375 $\pm$ 0.0015                    | -22.42                                                                                  | 0.5332 $\pm$ 0.0172                        | -17.00                                                                                    | 0.3809 $\pm$ 0.0038                          | -23.77                                                                               | 0.2437 $\pm$ 0.0024                     |
| S3     | -22.43                                                      | 0.3201                                    | -23.31                                                                              | 0.1694 $\pm$ 0.0016                    | -22.60                                                                                  | 0.7368 $\pm$ 0.0169                        | -18.69                                                                                    | 0.4547 $\pm$ 0.0029                          | -24.11                                                                               | 0.2590 $\pm$ 0.0025                     |
| S4     | -25.16                                                      | 0.2403                                    | -24.33                                                                              | 0.3145 $\pm$ 0.0045                    | -25.83                                                                                  | 0.4019 $\pm$ 0.0076                        | -24.36                                                                                    | 0.5005 $\pm$ 0.0036                          | -24.28                                                                               | 0.5101 $\pm$ 0.0030                     |
| S5     | -25.52                                                      | 0.3053                                    | -24.55                                                                              | 0.3382 $\pm$ 0.0049                    | -25.85                                                                                  | 0.4779 $\pm$ 0.0119                        | -24.57                                                                                    | 0.6487 $\pm$ 0.0036                          | -24.54                                                                               | 0.6655 $\pm$ 0.0041                     |
| S6     | -25.59                                                      | 0.3483                                    | -24.57                                                                              | 0.3707 $\pm$ 0.0063                    | -25.76                                                                                  | 0.5966 $\pm$ 0.0098                        | -24.84                                                                                    | 0.7226 $\pm$ 0.0033                          | -24.68                                                                               | 0.7315 $\pm$ 0.0034                     |

527  
528  
529  
530  
531  
532  
533  
534  
535  
536  
537  
538  
539

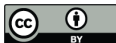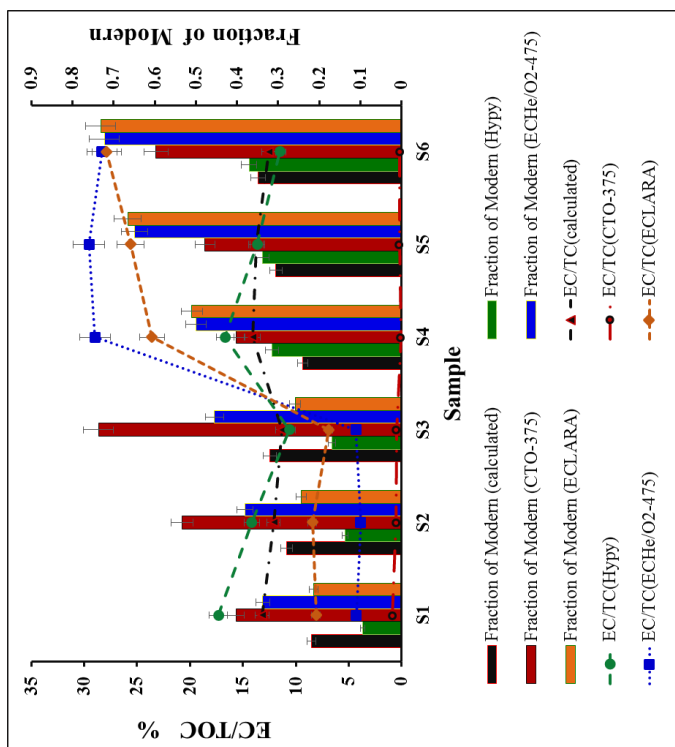

540

541 **Figure 1.** The EC/TOC% and <sup>14</sup>C results of EC from the six synthetic known samples by four separation methods.  
 542
